# Supplementary material for: X-ray crystallographic and kinetic studies of biguanide containing aryl sulfonamides as carbonic anhydrase inhibitors
Source: Royal Society of Chemistry journal article supplement (doi:10.1039/d4md01018c), 2025-01-01
Supplement: d4md01018c1.pdf [file d4md01018c1.pdf]

Supplementary Material for

**X-ray crystallographic and kinetic studies of biguanide containing aryl sulfonamides as  
Carbonic anhydrase inhibitors**

Chiara Baroni<sup>1</sup>, Murat Bozdog<sup>2</sup>, Gioele Renzi<sup>2</sup>, Viviana De Luca<sup>3</sup>, Clemente Capasso<sup>3</sup>, Carla Bazzicalupi<sup>1</sup>, Silvia Selleri<sup>2</sup>, Marta Ferraroni<sup>1</sup>, Fabrizio Carta<sup>2</sup>, and Claudiu T. Supuran<sup>2</sup>

<sup>1</sup> Department of Chemistry “Ugo Schiff”, University of Florence, Via della Lastruccia 3, 50019 Sesto Fiorentino (FI), Italy;

<sup>2</sup> NEUROFARBA Department, University of Florence, Via Ugo Schiff 6, 50019 Sesto Fiorentino (FI), Italy

<sup>3</sup> Department of Biology, Institute of Bioscience and Bioresources (IBBR)-CNR, via P. Castellino 111, 80131 Napoli (NA), Italy

\*Corresponding author: ([fabrizio.carta@unifi.it](mailto:fabrizio.carta@unifi.it) and [marta.ferraroni@unifi.it](mailto:marta.ferraroni@unifi.it))

**Index**

|                                                                                                                                                   |       |
|---------------------------------------------------------------------------------------------------------------------------------------------------|-------|
| <sup>1</sup> H, <sup>13</sup> C, Spectra of compounds                                                                                             | S2-S4 |
| Table S1. Summary of Data Collection and Refinement Statistics of hCA II- <b>5b</b> , hCAII- <b>5b</b> with glycerol and mimic-hCA XII- <b>5b</b> | S5    |
| Table S2. Summary of Data Collection and Refinement Statistics of hCA II- <b>5c</b>                                                               | S6    |
| Figure S1. The amino acid sequence of the hCA XII-mimic protein                                                                                   | S7    |

$^1\text{H}$  NMR spectrum of compound **5a** (400 MHz,  $\text{DMSO-}d_6$ )

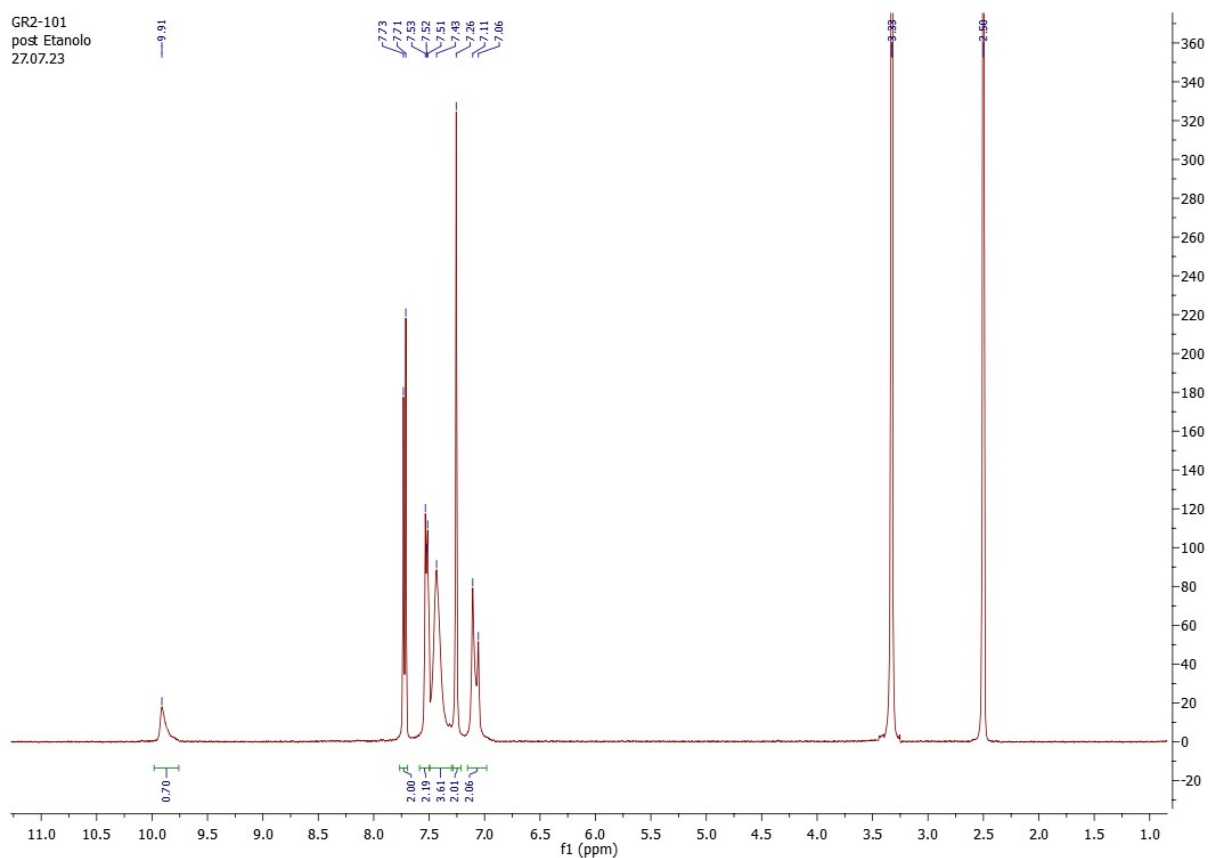

$^{13}\text{C}$  NMR spectrum of compound **5a** (100 MHz,  $\text{DMSO-}d_6$ )

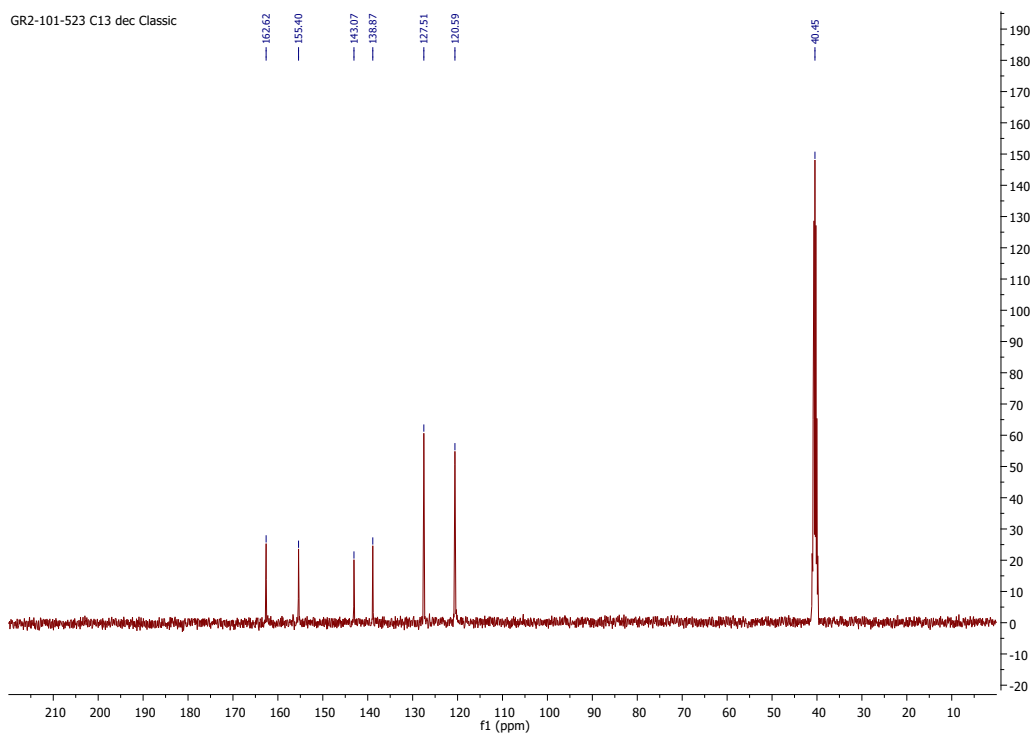

$^1\text{H}$  NMR spectrum of compound **5b** (400 MHz,  $\text{DMSO-}d_6$ )

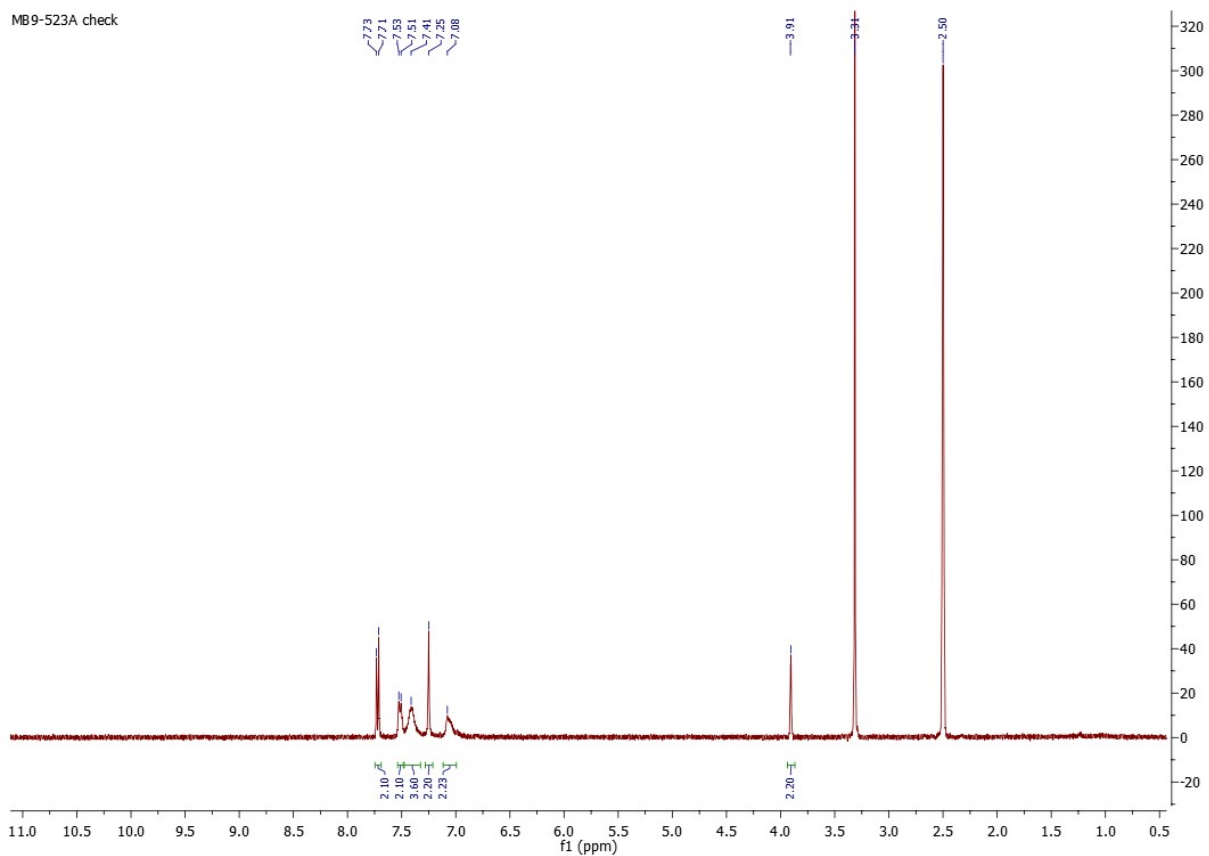

$^{13}\text{C}$  NMR spectrum of compound **5b** (100 MHz,  $\text{DMSO-}d_6$ )

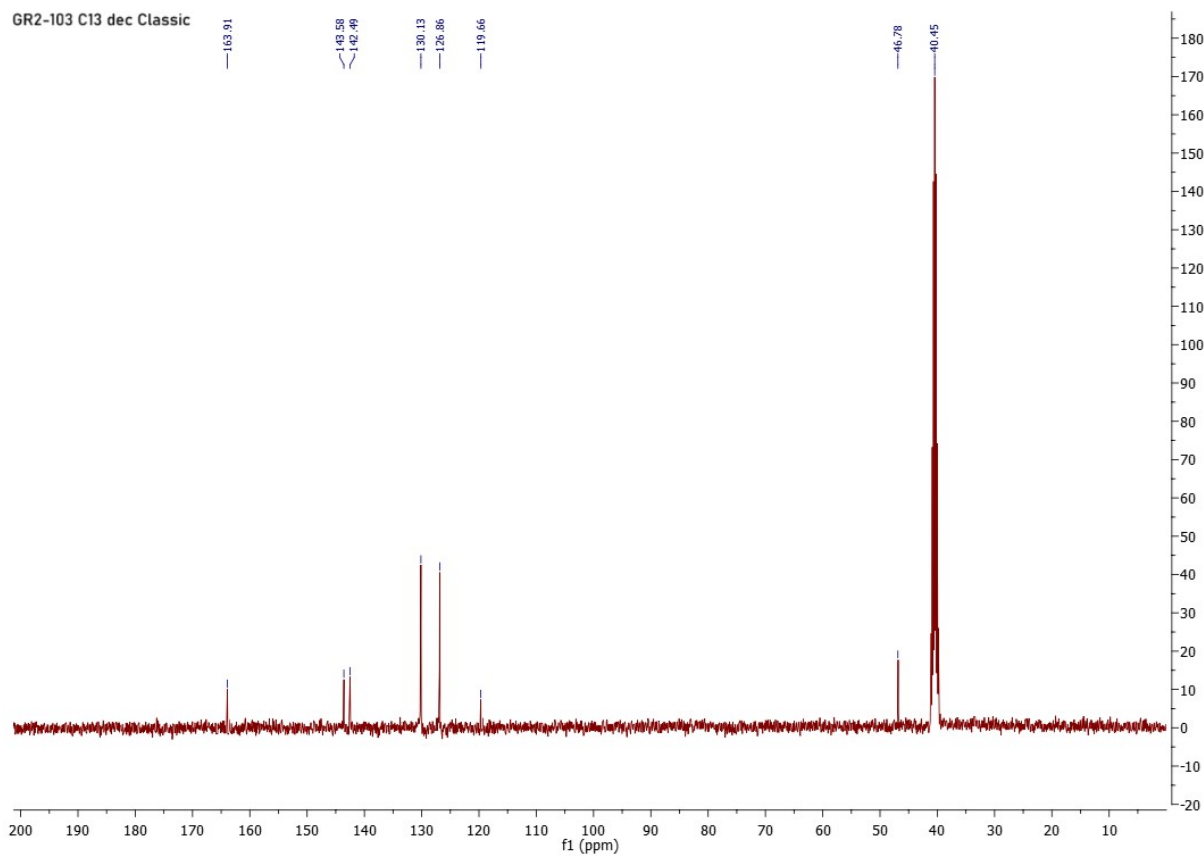

$^1\text{H}$  NMR spectrum of compound **5c** (400 MHz,  $\text{DMSO-}d_6$ )

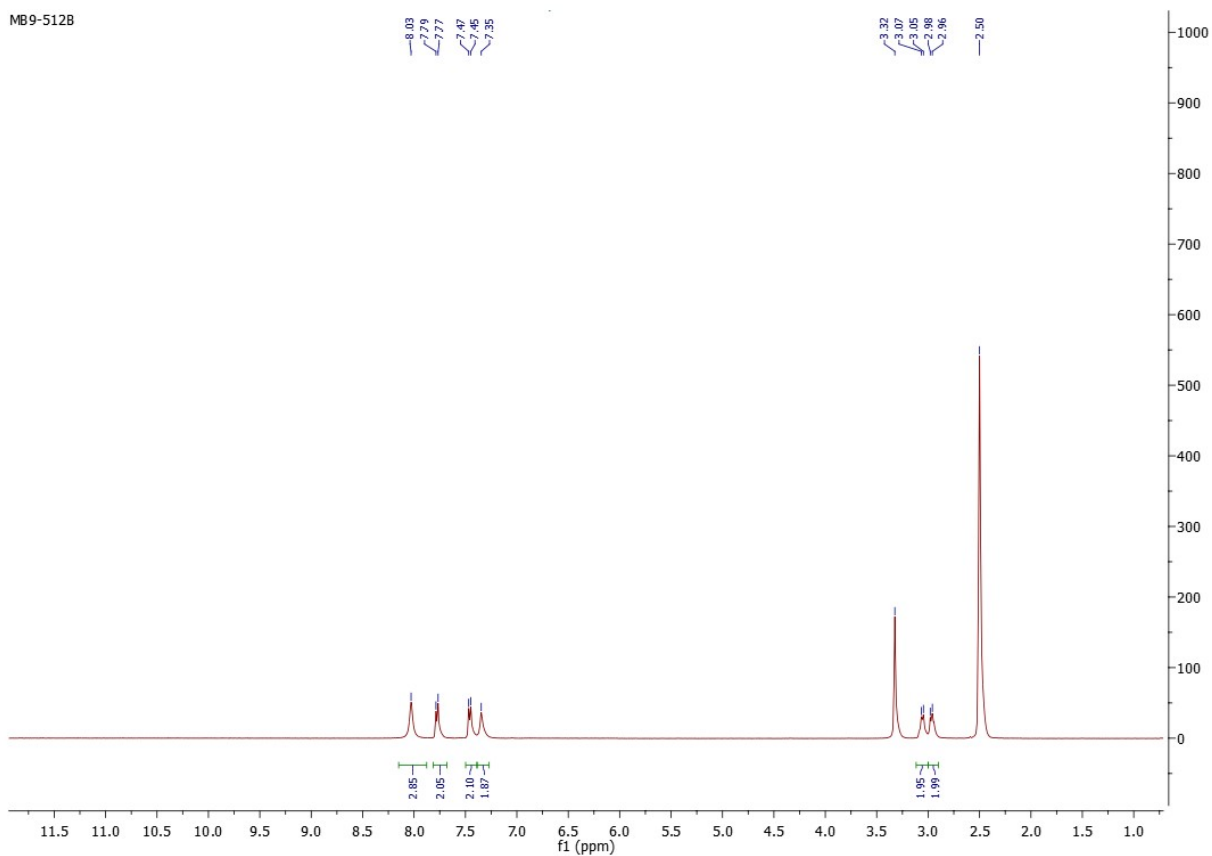

$^{13}\text{C}$  NMR spectrum of compound **5c** (100 MHz,  $\text{DMSO-}d_6$ )

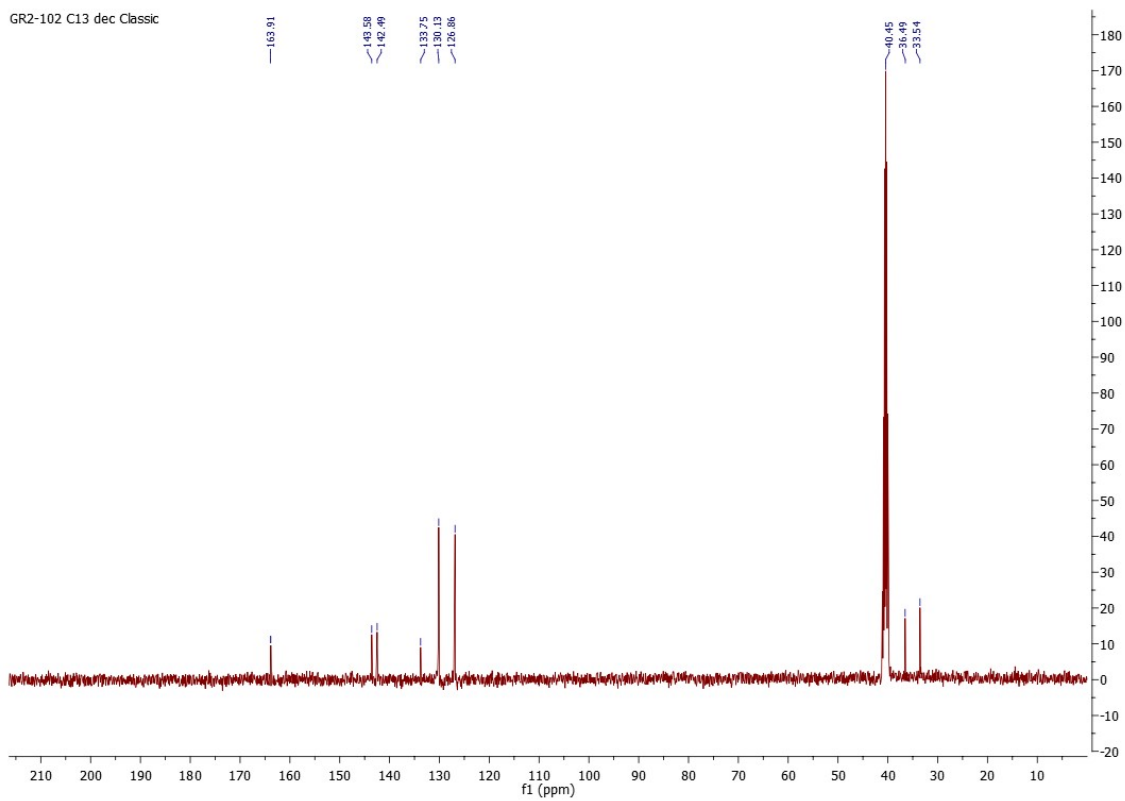

**Table S1. Summary of Data Collection and Refinement Statistics Values in brackets refer to the highest resolution shell.**

| Data Collection statistics              |                                   |                                   |                                   |
|-----------------------------------------|-----------------------------------|-----------------------------------|-----------------------------------|
|                                         | <b>CA II-5b</b>                   | <b>CAII-5b<br/>with glycerol</b>  | <b>CA XII-5b</b>                  |
| PDB ID                                  | 8ROU                              | 8ROW                              | 8RNS                              |
| Wavelength<br>(Å)                       | 1.0001                            | 0.9718                            | 1.0001                            |
| Space Group                             | P 2 <sub>1</sub>                  | P2 <sub>1</sub>                   | P 21                              |
| Unit cell (a, b, c, α, β, γ)<br>(Å, °)  | 42.28 41.09 72.29<br>90 104.20 90 | 42.44 41.30 72.03<br>90 104.29 90 | 41.98 41.33 71.81<br>90 103.87 90 |
| Limiting resolution<br>(Å)              | 70.08-1.08 (1.10-<br>1.08)        | 40.02-1.05 (1.07-<br>1.05)        | 40.76-1.14 (1.16-<br>1.14)        |
| Unique reflections                      | 102568 (5042)                     | 107024 (4661)                     | 85727 (3897)                      |
| Rmerge                                  | 0.081 (1.403)                     | 0.049 (0.706)                     | 0.07 (1.351)                      |
| Rmeas                                   | 0.089 (1.591)                     | 0.054 (0.801)                     | 0.076 (1.547)                     |
| Redundancy                              | 5.9 (4.5)                         | 6.1 (4.5)                         | 5.9 (4.3)                         |
| Completeness overall<br>(%)             | 99.8 (99.7)                       | 95.0 (83.7)                       | 98.2 (90.0)                       |
| <I/σ(I)>                                | 9.8 (1.1)                         | 16.7 (2.2)                        | 12.0 (1.1)                        |
| CC (1/2)                                | 1.0 (0.3)                         | 1.0 (0.7)                         | 1.0 (0.4)                         |
| <b>Refinement statistics</b>            |                                   |                                   |                                   |
| Resolution range<br>(Å)                 | 70.08-1.08                        | 40.02-1.05                        | 40.76-1.14                        |
| Rfactor                                 | 0.1301                            | 0.1160                            | 0.1415                            |
| Rfree                                   | 0.1515                            | 0.1386                            | 0.1614                            |
| r.m.s.d. bonds<br>(Å)                   | 0.0118                            | 0.0124                            | 0.0113                            |
| r.m.s.d. angles<br>(°)                  | 1.8997                            | 1.9011                            | 1.7661                            |
| <b>Ramachandran statistics (%)</b>      |                                   |                                   |                                   |
| Most favored                            | 97.3                              | 97.3                              | 96.9                              |
| additionally allowed                    | 2.7                               | 2.7                               | 3.1                               |
| Outlier regions                         | 0.0                               | 0.0                               | 0.0                               |
| <b>Average B factor (Å<sup>2</sup>)</b> |                                   |                                   |                                   |
| All atoms                               | 15.1                              | 13.9                              | 17.9                              |
| Inhibitors                              | 14.6                              | 13.6 / 23.1                       | 23.5                              |
| Solvent                                 | 17.1                              | 15.8                              | 20.0                              |

**Table S2. Summary of Data Collection and Refinement Statistics Values in brackets refer to the highest resolution shell.**

| Data Collection statistics                                   |                                         |
|--------------------------------------------------------------|-----------------------------------------|
|                                                              | <b>CA II-5c</b>                         |
| PDB ID                                                       | 9H0V                                    |
| Wavelength<br>(Å)                                            | 1.0002                                  |
| Space Group                                                  | P 21                                    |
| Unit cell (a, b, c, $\alpha$ , $\beta$ , $\gamma$ )<br>(Å, ) | 42.43 41.26 72.47<br>90 104.72 90       |
| Limiting resolution<br>(Å)                                   | 35.56-1.40 (1.42-1.40)                  |
| Unique reflections                                           | 43258 (2316)                            |
| Rmerge                                                       | 0.040 (0.200)                           |
| Rmeas                                                        | 0.044 (0.216)                           |
| Redundancy                                                   | 6.2 (6.7)                               |
| Completeness overall<br>(%)                                  | 90.3 (97.4)                             |
| $\langle I/\sigma(I) \rangle$                                | 24.2 (8.6)                              |
| CC (1/2)                                                     | 0.999 (0.981)                           |
|                                                              | <b>Refinement statistics</b>            |
| Resolution range<br>(Å)                                      | 35.56-1.40                              |
| Rfactor                                                      | 0.0991                                  |
| Rfree                                                        | 0.1380                                  |
| r.m.s.d. bonds<br>(Å)                                        | 0.0105                                  |
| r.m.s.d. angles<br>( )                                       | 1.9264                                  |
|                                                              | <b>Ramachandran statistics (%)</b>      |
| Most favored                                                 | 96.1                                    |
| additionally allowed                                         | 3.9                                     |
| Outlier regions                                              | 0.0                                     |
|                                                              | <b>Average B factor (Å<sup>2</sup>)</b> |
| All atoms                                                    | 16.8                                    |
| Inhibitors                                                   | 22.4 / 30.9                             |
| solvent                                                      | 31.6                                    |

>hCA II

MSHHWGYGKHNGPEHWHKDFPIAKGERQSPVDIDTHTAKYDPSLKPLSVSYDQATSLRILNNGHAFNVEFDDSQDKAVLKGGPLDGTYR  
LIQFHFHWGSLDGQGESEHTVDKKKYAAELHLVHWNTKYGDFGKAVQQPDGLAVLGI FLKVGSAK PGLQKVVDVLD SIKTKGKSADFTNF  
DPRGLLPESLDYWTYPGSLTTPPLECVTWIVLKEPISVSSEQVLKFRKLNFNNGEPEELMVDNWRPAQPLKNRQIKASFK

>hCA XII mimic

MSHHWGYGKHNGPEHWHKDFPIAKGERQSPVDIDTHTAKYDPSLKPLSVSYDQATSLRILNNGH**SFKVNF**DDSQDKAVLKGGPLDGTYR  
**L****T**QFHFHWGSLDGQGESEHTVDKKKYAAELHLVHWNTKYGD**ASKAS**QQPDGLAVLGI FLKVGSAK PGLQKVVDVLD SIKTKGKSADFTNF  
DPRGLLPESLDYWTYPGSLTTPPL**NET**VTWIVLKEPISVSSEQVLKFRKLNFNNGEPEELMVDNWRPAQPLKNRQIKASFK

|         |                                                                                  |     |
|---------|----------------------------------------------------------------------------------|-----|
| hCA II  | MSHHWGYGKHNGPEHWHKDFPIAKGERQSPVDIDTHTAKYDPSLKPLSVSYDQATSLRIL                     | 60  |
| hCA XII | MSHHWGYGKHNGPEHWHKDFPIAKGERQSPVDIDTHTAKYDPSLKPLSVSYDQATSLRIL                     | 60  |
|         | NNGH <b>AFNVE</b> FDDSQDKAVLKGGPLDGTYR <b>L</b> IQFHFHWGSLDGQGESEHTVDKKKYAAELHL  | 120 |
|         | NNGH <b>SFKVNF</b> FDDSQDKAVLKGGPLDGTYR <b>L</b> TQFHFHWGSLDGQGESEHTVDKKKYAAELHL | 120 |
|         | VHWNTKYGD <b>FGKAV</b> QQPDGLAVLGI FLKVGSAK PGLQKVVDVLD SIKTKGKSADFTNFDP         | 180 |
|         | VHWNTKYGD <b>ASKAS</b> QQPDGLAVLGI FLKVGSAK PGLQKVVDVLD SIKTKGKSADFTNFDP         | 180 |
|         | RGLLPESLDYWTYPGSLTTPPL <b>LEC</b> VTWIVLKEPISVSSEQVLKFRKLNFNNGEPEELM             | 240 |
|         | RGLLPESLDYWTYPGSLTTPPL <b>NET</b> VTWIVLKEPISVSSEQVLKFRKLNFNNGEPEELM             | 240 |
|         | VDNWRPAQPLKNRQIKASFK                                                             | 260 |
|         | VDNWRPAQPLKNRQIKASFK                                                             | 260 |

**Figure S1.** Amino acid sequence alignment of hCA II and hCA XII. Residues of hCA II bolded in red were replaced with the corresponding residues from hCA XII to create the mimic proteins.
